# Supplementary material for: Genomic Analysis Reveals New Integrative Conjugal Elements and Transposons in GBS Conferring Antimicrobial Resistance
Source: MDPI journal article supplement (doi:10.3390/antibiotics12030544), 2023-03-09
Supplement: s1 [file s1]

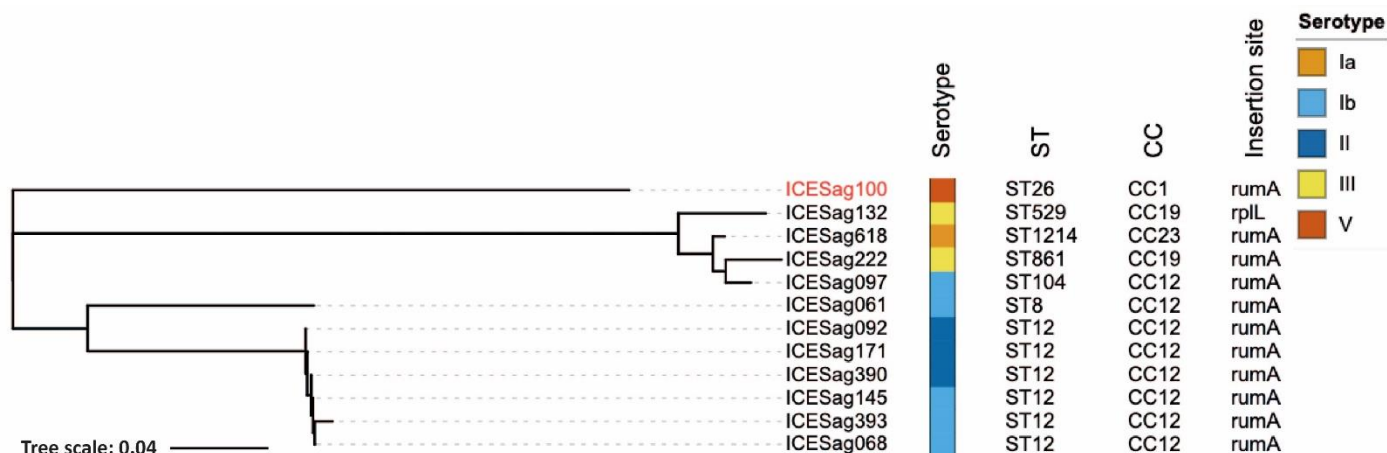

**Figure S1.** Neighbour joining phylogeny for the *tetO* alone carrying ICEs. Ten *tetO* ICEs were located at the *rumA*, and for one isolate the insertion site of ICE was *rplL*. The ICESag100 (accession no. OP715836) carrying *tetW* shown in red was included as an outgroup and was also inserted at *rumA*. Information of serotype, sequence type (ST), Clonal complex (CC) and insertion site of ICE are also provided next to the phylogeny.

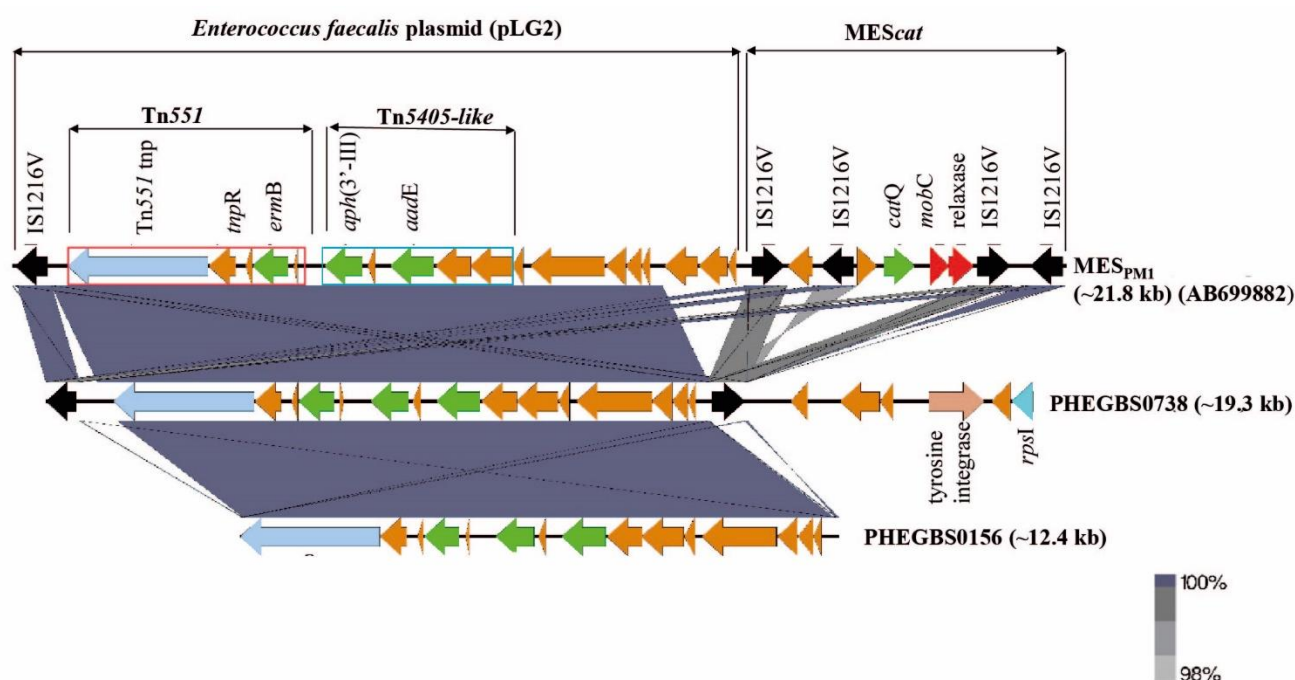

**Figure S2.** Comparison of *Staphylococcus aureus* composite mobile element structure MES<sub>PM1</sub> to CC19 GBS isolates. Two isolates PHEGBS0738 – V/ST19 and PHEGBS0156 – III/ST19 found to carry ARGs by MES<sub>PM1</sub> (AB699882) and reduced MES<sub>PM1</sub>, respectively. Blastn was performed using Easyfig v2.2.2. Different colours are indicating important features where light blue showing Tn551 transposon (tnp) gene, black showing insertion sequences - IS1216V, green - antibiotic resistance genes, red - conjugal proteins. pink-tyrosine integrase and orange other significant genes of MES<sub>PM1</sub>. Areas with BLAST hits shown by bars between sequences in grey colour. Genomic size of MES<sub>PM1</sub> is ~21.8 kb.

**Table S1. Substitutions in five Penicillin binding proteins (PBPs) identified in 193 GBS isolates relative to the reference PBPs.** The reference PBPs of *S. agalactiae* 2603V/R (NC\_004116) were used for this analysis. “NIL” represents no substitution observed and “-” represents gap observed.

| Penicillin binding protein types | Reference protein id for PBPs | Similarity (%) to reference PBPs | No. of isolates | Substitutions (none confer penicillin resistance and likely represent non-resistance polymorphisms) |
|----------------------------------|-------------------------------|----------------------------------|-----------------|-----------------------------------------------------------------------------------------------------|
| <b>PBP1a</b>                     | NP_68733<br>3.1               | 100                              | 6               | NIL                                                                                                 |
|                                  |                               | 99.98                            | 1               | S685N, N702D, G739_ G741del, V746A                                                                  |
|                                  |                               | 98.93                            | 2               | A27T, A734V, G739_N743del, V746A                                                                    |
|                                  |                               | 98.8                             | 1               | ins54S55S, S473N, N702D, N740_N743del, V746A                                                        |
|                                  |                               | 99.73                            | 77              | G739_N740del                                                                                        |
|                                  |                               | 99.6                             | 6               | R662H, G739_N740del                                                                                 |
|                                  |                               | 99.47                            | 14              | N740_G743del                                                                                        |
|                                  |                               |                                  | 1               | G739_N742del                                                                                        |
|                                  |                               | 99.33                            | 2               | N740_ G743del, F544V                                                                                |
|                                  |                               | 99.2                             | 3               | S685N, G739_ N742del, V746A                                                                         |
|                                  |                               | 99.07                            | 76              | N740_ N743del, V746A                                                                                |
|                                  |                               |                                  | 1               | G739_ N742del                                                                                       |
|                                  |                               | 99.02                            | 3               | A27T, G739S, N740_ N743del, V746A                                                                   |
|                                  |                               | <b>Total</b>                     | <b>193</b>      |                                                                                                     |
| <b>PBP1b</b>                     | NP_68719<br>4.1               | 100                              | 62              | NIL                                                                                                 |
|                                  |                               | 99.87                            | 59              | A36D (n=48); L41S (n=12)                                                                            |
|                                  |                               | 99.74                            | 66              | A95D + D505E (n=4); A36D + L46S (n=59); A95D + L41S (n=3)                                           |
|                                  |                               | 99.73                            | 3               | A36D, I46S                                                                                          |
|                                  |                               | 99.52%                           | 3               | A95D                                                                                                |
|                                  |                               | <b>Total</b>                     | <b>193</b>      |                                                                                                     |
| <b>PBP2a</b>                     | NP_68905<br>2.1               | 100                              | 80              | NIL                                                                                                 |
|                                  |                               | 99.96                            | 1               | A581T                                                                                               |
|                                  |                               | 99.74                            | 43              | E63K, N666K, V761L                                                                                  |
|                                  |                               | 99.61                            | 27              | P69L, K316Q, R345Q                                                                                  |
|                                  |                               | 99.57                            | 37              | E63K                                                                                                |
|                                  |                               | 99.53                            | 1               | E63K, V549                                                                                          |
|                                  |                               | 99.48                            | 2               | P69L, D313N, K316Q, R345Q                                                                           |
|                                  |                               | 99.40%                           | 1               | P69L, K316Q, R345K                                                                                  |
|                                  |                               | 99.35%                           | 1               | D18N, L317V                                                                                         |
|                                  |                               | <b>Total</b>                     | <b>193</b>      |                                                                                                     |
| <b>PBP2b</b>                     | NP_68778<br>0.1               | 100                              | 8               | NIL                                                                                                 |
|                                  |                               | 99.87                            | 168             | I1Mdel, L2M                                                                                         |

|              |                 |              |            |                         |
|--------------|-----------------|--------------|------------|-------------------------|
|              |                 | 99.8         | 13         | 1Mdel, L2M, V80A        |
|              |                 | 99.76        | 3          | V80A                    |
|              |                 | 99.6         | 1          | A69V, V80A, G470S       |
|              |                 | <b>Total</b> | <b>193</b> |                         |
| <b>PBP2x</b> | NP_68732<br>2.1 | 100          | 8          | NIL                     |
|              |                 | 99.78        | 88         | I377V                   |
|              |                 | 99.2         | 2          | I377V, V510I            |
|              |                 | 99.11%       | 1          | I377V, V510I, K570E     |
|              |                 | 95.21        | 11         | 1M_A35del, I377V        |
|              |                 | 95.08        | 79         | 1M_A35del, I377V, V510I |
|              |                 | 94.95        | 4          | 1M_A35del, Y366H, I377V |
|              |                 | <b>Total</b> | <b>193</b> |                         |
